# Supplementary material for: The Host Microbiota Contributes to Early Protection Against Lung Colonization by Mycobacterium tuberculosis
Source: Front Immunol. 2018 Nov 14;9:2656. doi: 10.3389/fimmu.2018.02656 (PMC6246741; doi:10.3389/fimmu.2018.02656)
Supplement: Supplementary Table 2 — Antibodies used in the study for flow cytometry. [file Table_2.XLSX]

## Sheet: Feuil1
	Supplementary Table S2. Antibodies used in the study for flow cytometry.
	Antibody	Clone	Provider
	anti-CD45.2	104	Biolegend
	anti-F4/80	BM8
	anti-Ly-6G/Ly-6C (Gr1)	RB6-8C5
	anti-CD11b	M1/70
	anti IA/IE	M5/114.15.2
	anti-CD11c	N418
	anti-CD64	X54-5/7.1
	anti-MerTK	2B10C42
	anti-Ly6G	1A8
	anti-CD45R (B220)	RA3-6B2
	anti-TCR beta	H57-597
	anti-CD196 (CCR6)	29-2L17
	anti-CD69	H1.2F3
	anti-CD3	17A2
	Zombie Aqua viability
	anti-CD4	RM4-5
	anti-CD19	6D5
	anti-Siglec-F	E50-2440	Becton Dickinson
	anti-TCR gamma/delta	GL3
	anti-NK1.1	PK136
	anti-CD90.2	53-2.1
	anti-IL-17A	TC11-18H10
	anti TNFa	MP6-XT22
	anti-Ki67	SolA15	Ebioscience
